# Supplementary material
Source: MDPI journal article supplement (https://www.mdpi.com/2073-4344/11/10/1196)
Supplement: s1 [file s1 › Supporting Information-3_title.pdf]

**Supporting Information for**

**Hybrid structure of TiO<sub>2</sub>-graphitic carbon as a support of Pt nanoparticles for catalyzing oxygen reduction reaction**

*Su-Jin Jang<sup>a,b</sup>, Yun Chan Kang<sup>b</sup>, Jin-Su Hyun<sup>c</sup>, Tae Ho Shin<sup>a</sup>, Young Wook Lee<sup>d</sup>, and Kwang Chul Roh<sup>a</sup>*

<sup>a</sup>Energy and Environmental Division, Korea Institute of Ceramic Engineering and Technology, Jin-ju 52851, Republic of Korea

<sup>b</sup>Department of Materials Science and Engineering, Korea University, Anam-Dong, Seongbuk-Gu, Seoul 136-713, Republic of Korea

<sup>c</sup>Material business team, Vina Tech Co. Ltd, Jeonju-si, Jeollabuk-do 54853, Republic of Korea

<sup>d</sup>Department of Education Chemistry and Research Institute of National Sciences, Gyeongsang National University, Jinju 52828, Republic of Korea

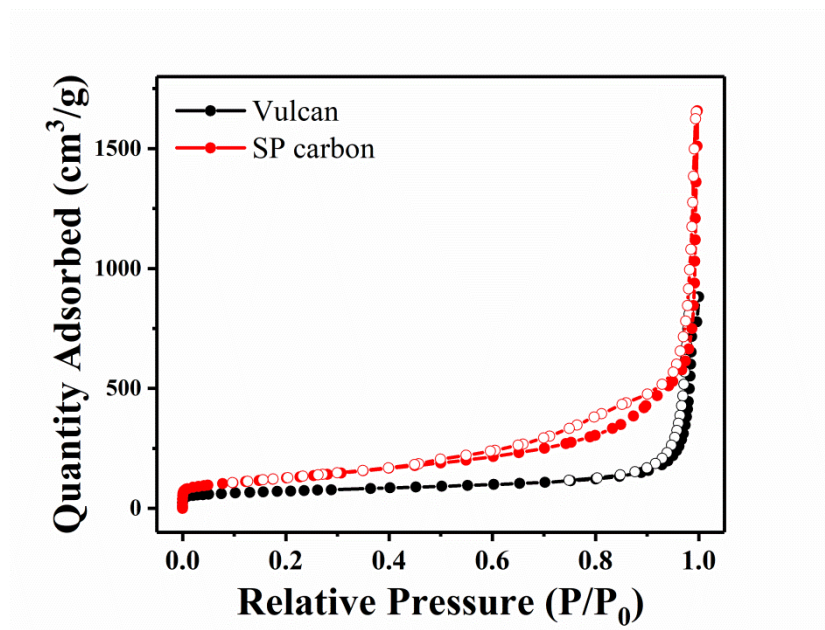

Figure S1. Nitrogen adsorption-desorption isotherms for Vulcan carbon and SP carbon.

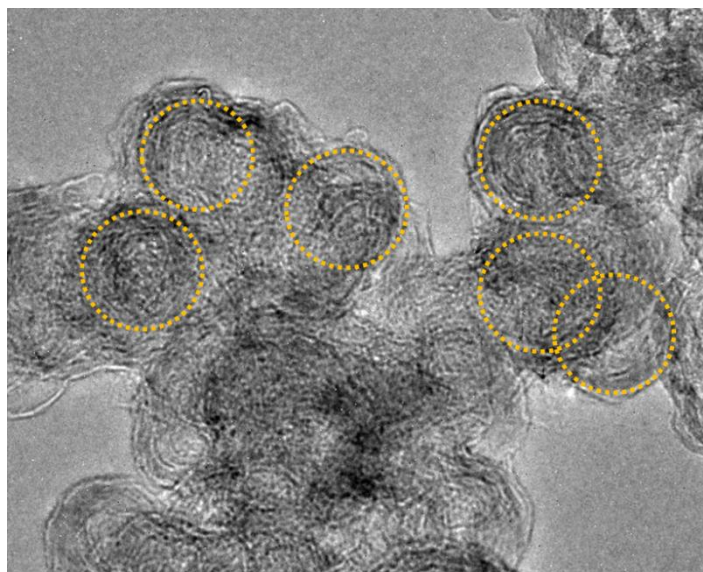

Figure S2. HR-TEM images of SP carbon.

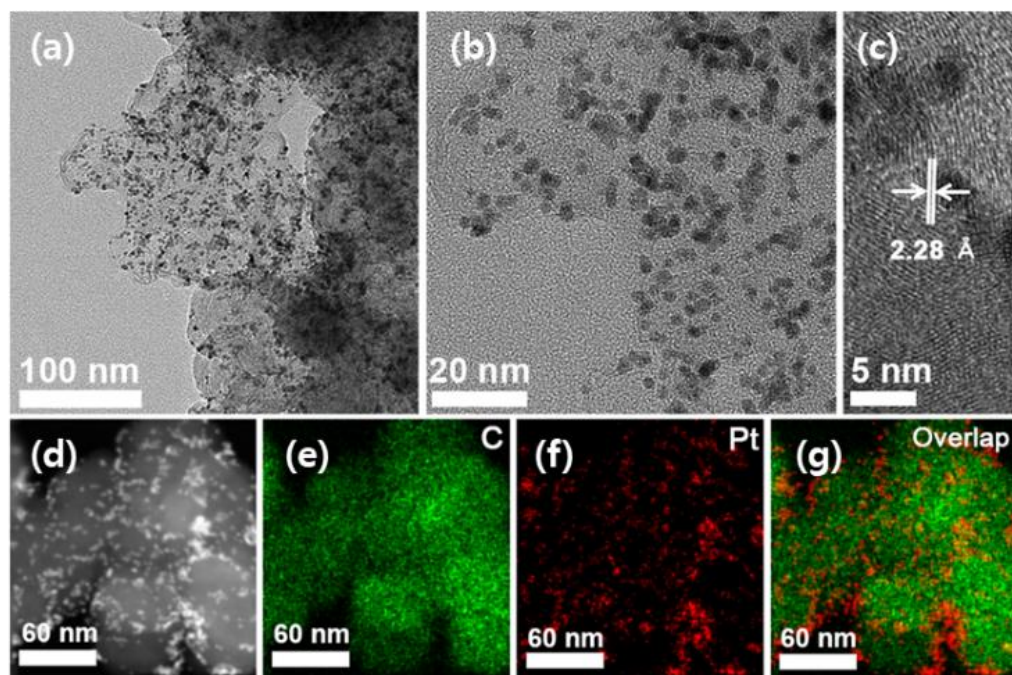

Figure S3. (a) TEM, (b) magnification of TEM and (c) HR-TEM images of SP-Pt. (d) HAADF-STEM image and (e-g) Corresponding elemental mapping images.

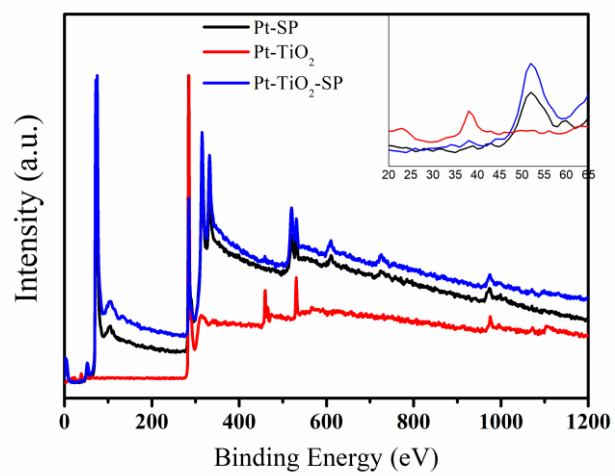

Figure S4. XPS survey spectra of Pt-SP, Pt-TiO<sub>2</sub>, and Pt-TiO<sub>2</sub>-SP.

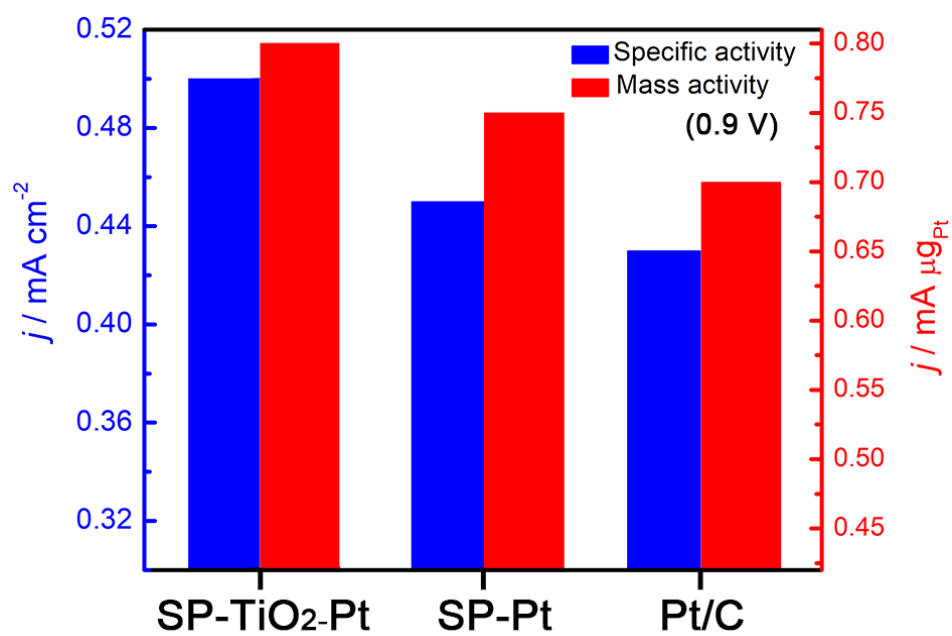

Figure S5. Mass activity and Specific activity of SP-TiO<sub>2</sub>, SP-Pt, and commercial Pt/C.

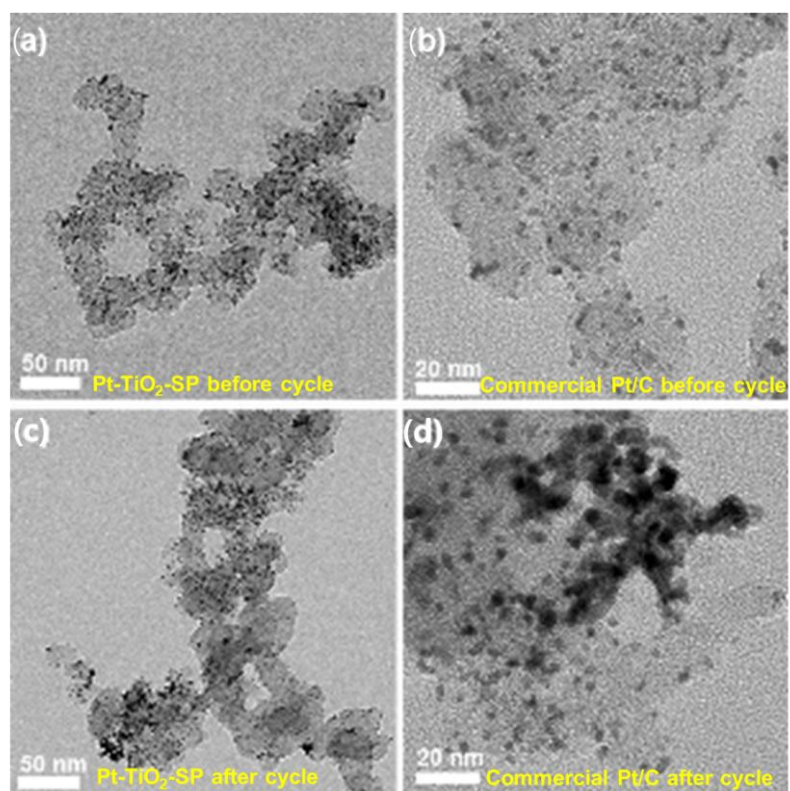

Figure S6. TEM images of before(a,b) and after 5000 cycles(c,d) of Pt-TiO<sub>2</sub>-SP(a,c) and commercial Pt/C(b,d).

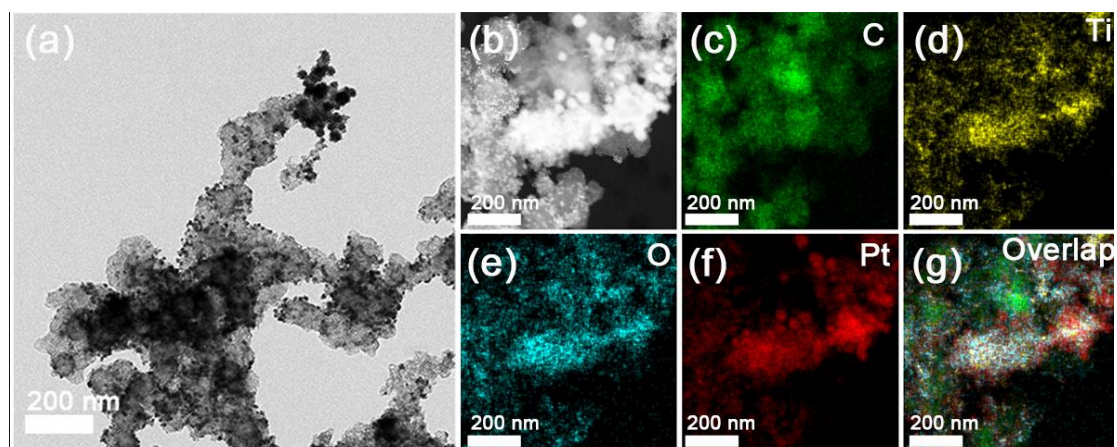

Figure S7. (a) TEM images of after 5000 cycles 40 wt.% Pt on SP-TiO<sub>2</sub>. Corresponding elemental mapping images(b-g).

Table S1. ORR performances for the present Pt-TiO<sub>2</sub>-SP and the reported Pt-based catalyst at 0.9V.

| Sample name              | Onset potential (V) | Pt loading (%) | Mass activity (A <sub>mg</sub> <sup>-1</sup> ) | Specific activity (mA <sub>cm</sub> <sup>-2</sup> ) | ref       |
|--------------------------|---------------------|----------------|------------------------------------------------|-----------------------------------------------------|-----------|
| Pt-TiO <sub>2</sub> -SP  | 0.914               | 36             | 0.80                                           | 0.50                                                | This work |
| Pt/TiO <sub>2</sub> -30  | 0.967               | 37             | 0.045                                          | 0.668                                               | [1]       |
| Pt/TiO <sub>2</sub> -2/C | 0.88                | 31             | 0.055(at0.8V)                                  | 0.45                                                | [2]       |
| Pt NCs/CNTs-10%          | 0.87                | 10             | 0.167                                          | 0.194                                               | [3]       |

[1] G. Mirshekari, C. Rice, Effects of support particle size and Pt content on catalytic activity and durability of Pt/TiO<sub>2</sub> catalyst for oxygen reduction reaction in proton exchange membrane fuel cells environment, *Journal of Power Sources*, 396 (2018) 606-614.

[2] E.C. Barbosa, L.S. Parreira, I.C. de Freitas, L.R. Aveiro, D.C. de Oliveira, M.C. dos Santos, P.H. Camargo, Pt-decorated TiO<sub>2</sub> materials supported on carbon: increasing activities and stabilities toward the ORR by tuning the Pt loading, *ACS Applied Energy Materials*, 2 (2019) 5759-5768.

[3] J. Liu, J. Yin, B. Feng, T. Xu, F. Wang, Enhanced electrocatalytic activity and stability toward the oxygen reduction reaction with unprotected Pt nanoclusters, *Nanomaterials*, 8 (2018) 955.

Table S2. Electrical conductivity of SPcarbon, TiO<sub>2</sub>-SP, Vulcan carbon, and TiO<sub>2</sub>.

| Sample name                                         | SPcarbon | TiO <sub>2</sub> -SP | Vulcan carbon | TiO <sub>2</sub> |
|-----------------------------------------------------|----------|----------------------|---------------|------------------|
| Electrical<br>conductivity<br>(S cm <sup>-1</sup> ) | 3.7      | 3.0                  | 2.1           | immeasurable     |
